# Supplementary material
Source: Springer Nature journal article supplement (https://www.springermedizin.de/resource/supplementary/12916_2009_247_MOESM1_ESM.pdf/9599480)
Supplement: MOESM1 [file 9599480]

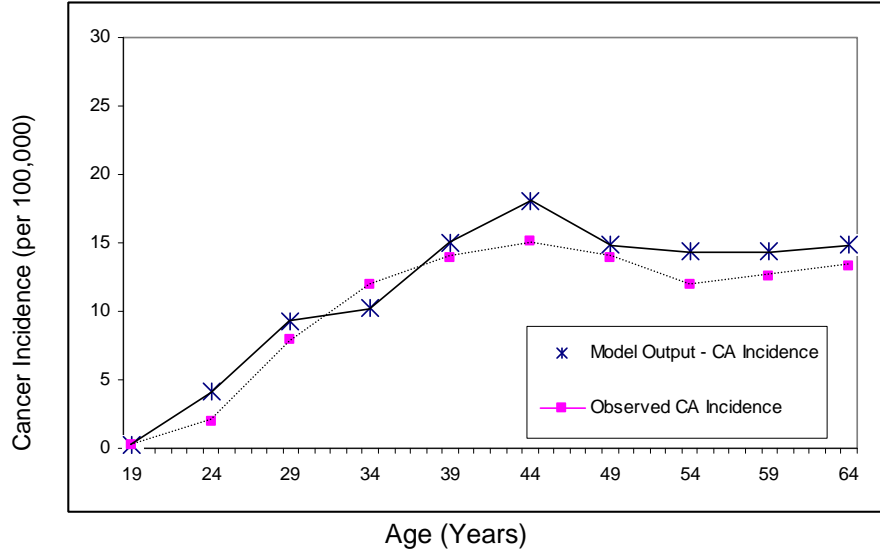

Cancer Incidence curve for Canada

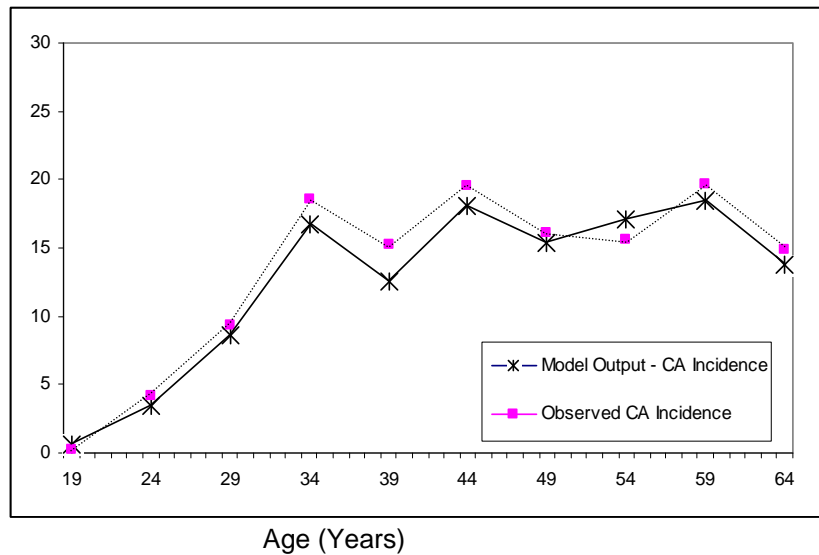

Cancer Incidence Curve for Alberta

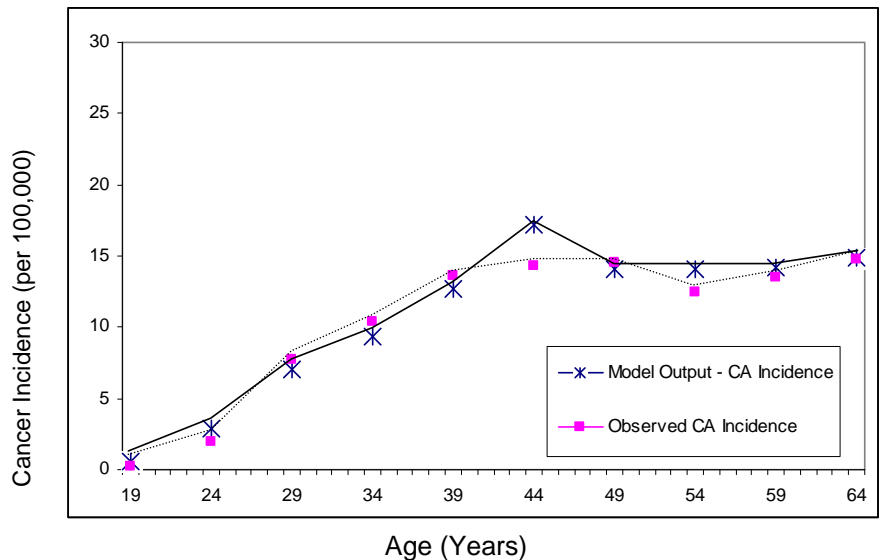

Cancer Incidence Curve for Ontario

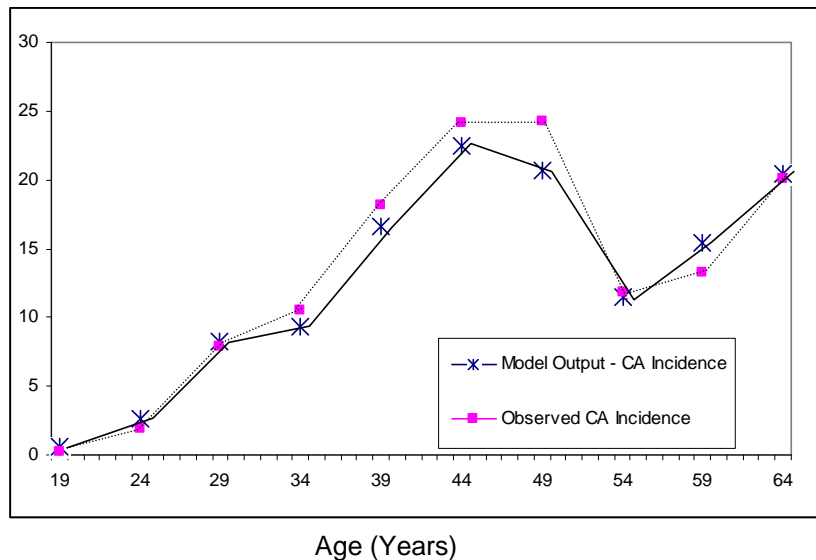

Cancer Incidence curve for Newfoundland
